# Supplementary material for: TOX3 is expressed in mammary ER+ epithelial cells and regulates ER target genes in luminal breast cancer
Source: Springer Nature journal article supplement (doi:10.1186/s12885-015-1018-2), 2015-01-29

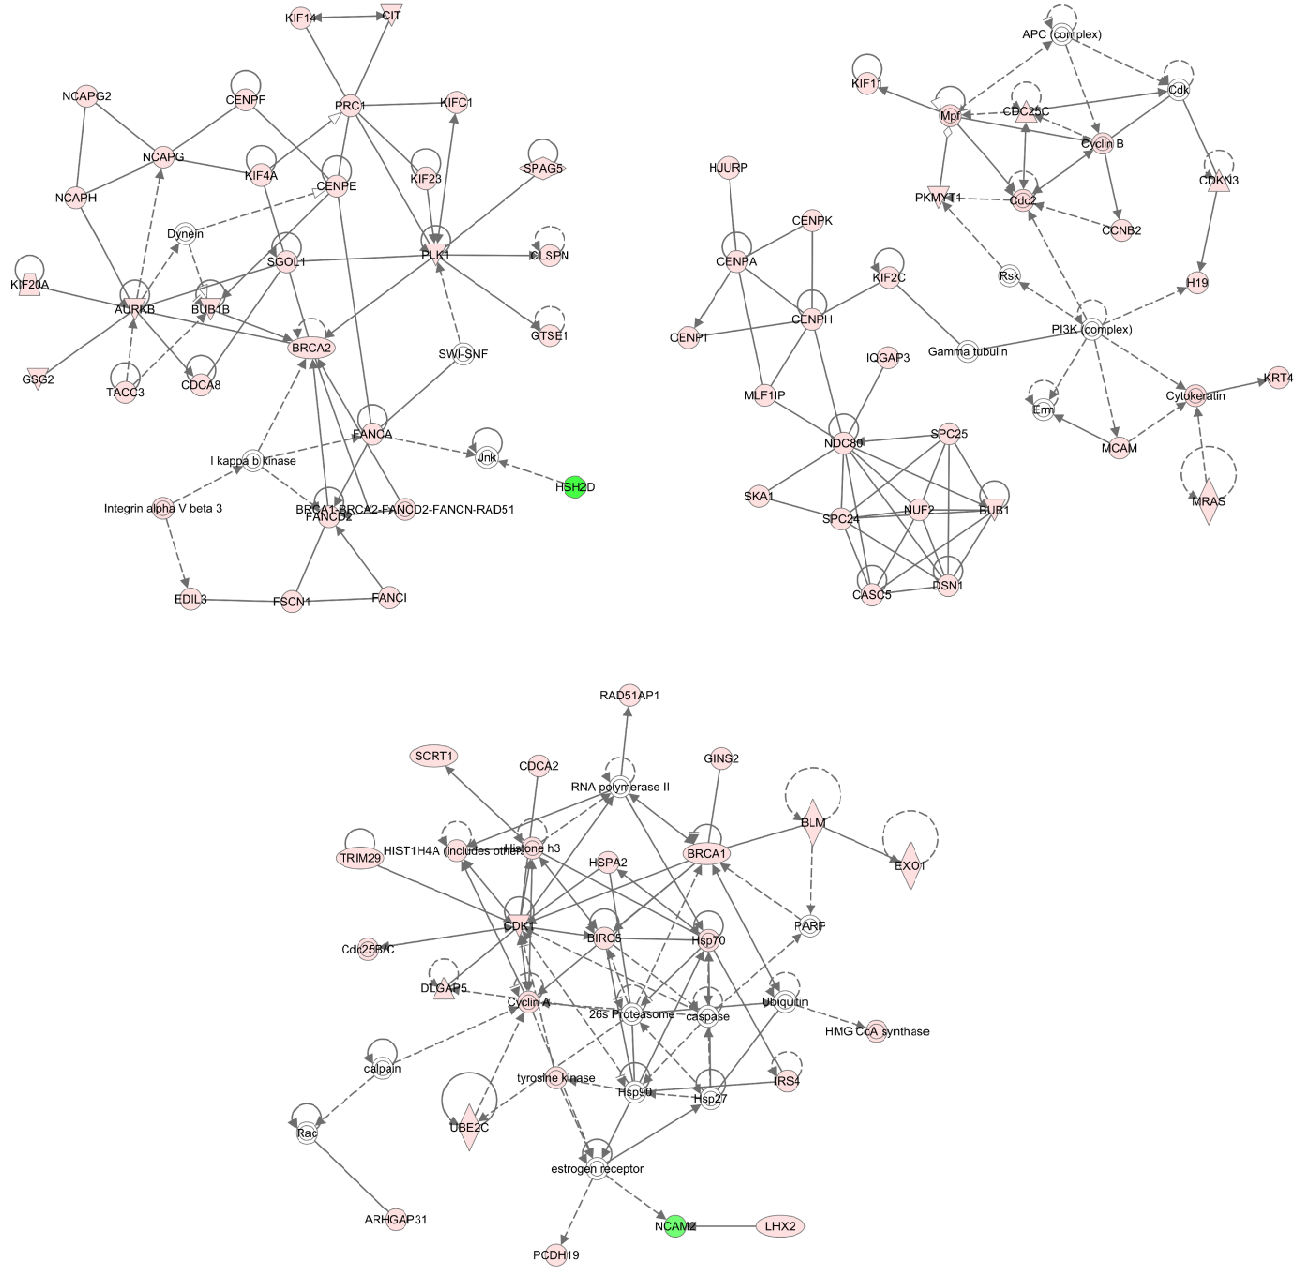

Supplement: MOESM4 [file 9743824]
